# Supplementary material for: Effect of mono- and dinuclear thiosemicarbazone platinacycles in the proliferation of a colorectal carcinoma cell line
Source: Royal Society of Chemistry journal article supplement (doi:10.1039/d4dt01490a), 2024-01-01

## Supplementary material

### Effect of mono- and dinuclear thiosemicarbazone platinumacycles in the proliferation of colorectal carcinoma cell line

Francisco Reigosa-Chamorro<sup>a,†</sup>, Sandra Cordeiro<sup>b,c,†</sup>, M. Teresa Pereira<sup>a</sup>, Beatriz Filipe<sup>b,c</sup>, Pedro V Baptista<sup>b,c</sup>, Alexandra R Fernandes<sup>b,c,\*</sup>, José M. Vila<sup>a,\*</sup>

<sup>a</sup>*Departamento de Química Inorgánica, Universidade de Santiago de Compostela, Avenida das Ciencias s/n, 15782 Santiago de Compostela, Spain.*

<sup>b</sup>*Associate Laboratory i4HB - Institute for Health and Bioeconomy, NOVA School of Science and Technology, NOVA University Lisbon, 2819-516 Caparica, Portugal*

<sup>c</sup>*UCIBIO, Departamento de Ciências da Vida, Faculdade de Ciências e Tecnologia, Universidade Nova de Lisboa, Portugal*

<sup>†</sup> both authors contributed equally

\*Corresponding authors: ARF, e-mail: [ma.fernandes@fct.unl.pt](mailto:ma.fernandes@fct.unl.pt); JMV, e-mail: [josemanuel.vila@usc.es](mailto:josemanuel.vila@usc.es).

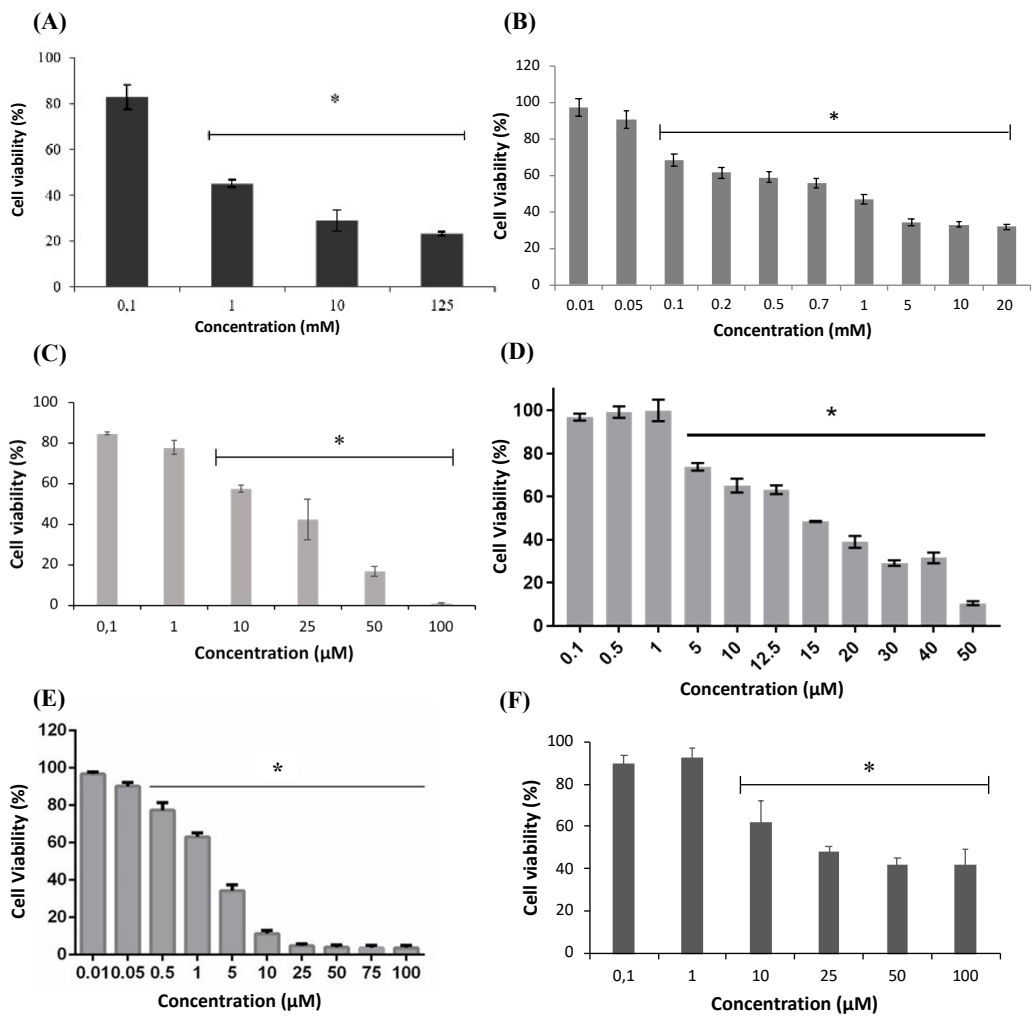

**Figure S1.** Cytotoxicity of doxorubicin in the cell lines: HCT116 (A), A2780 (B) and Fibroblasts (C) after 48 h of exposure and cytotoxicity of cisplatin in the cell lines: HCT116 (D), A2780 (E) and Fibroblasts (F) after 48 h of exposure. Data are expressed as the mean  $\pm$  SEM of three independent assays.

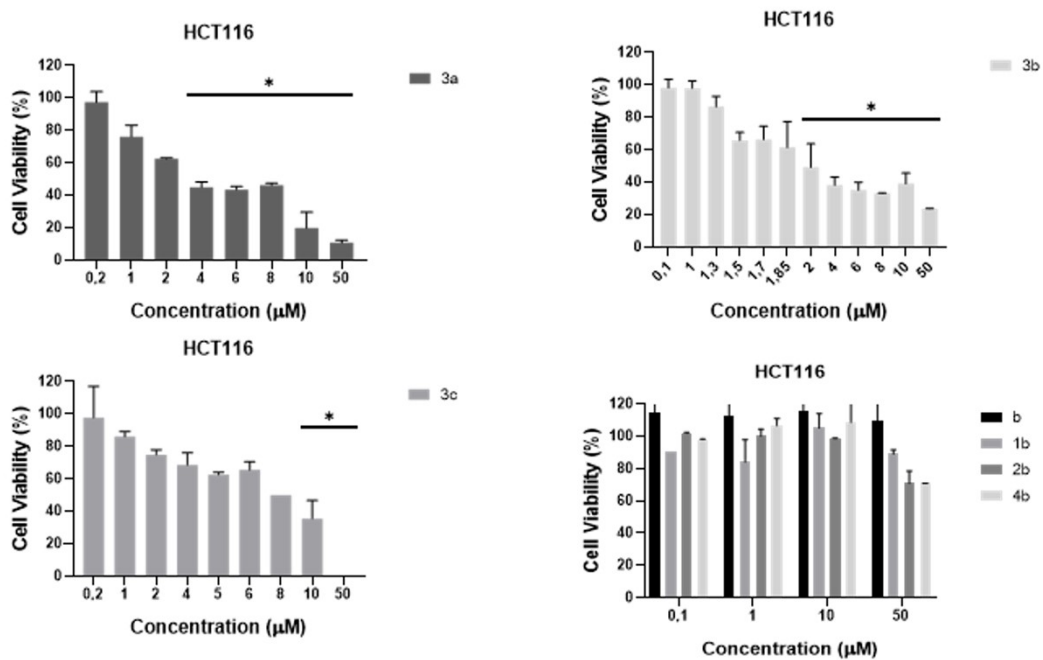

**Figure S2.** Cytotoxicity of the compounds in cell line HCT116 after 48 h of exposure. Data are expressed as the mean  $\pm$  SEM of three independent assays.

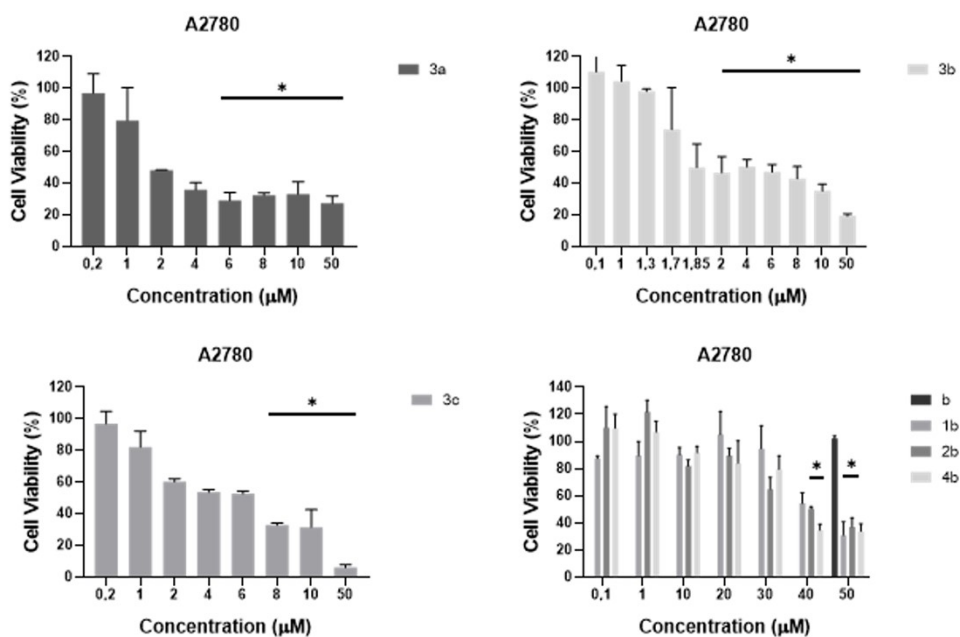

**Figure S3.** Cytotoxicity of the compounds in cell line A2780 after 48 h of exposure. Data are expressed as the mean  $\pm$  SEM of three independent assays.

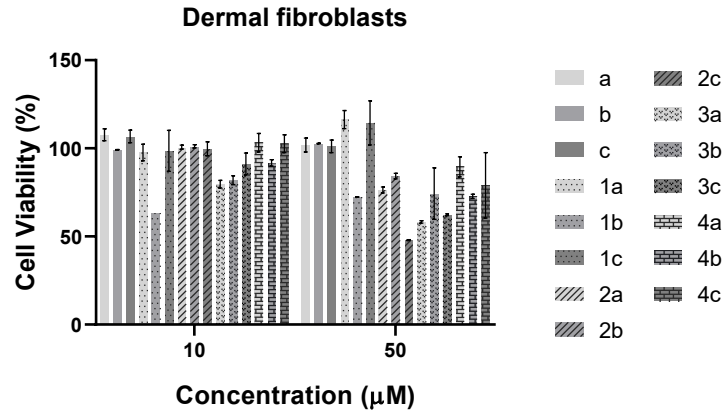

**Figure S4.** Cytotoxicity of the compounds in Fibroblasts after 48 h of exposure. Data are expressed as the mean  $\pm$  SEM of three independent assays.

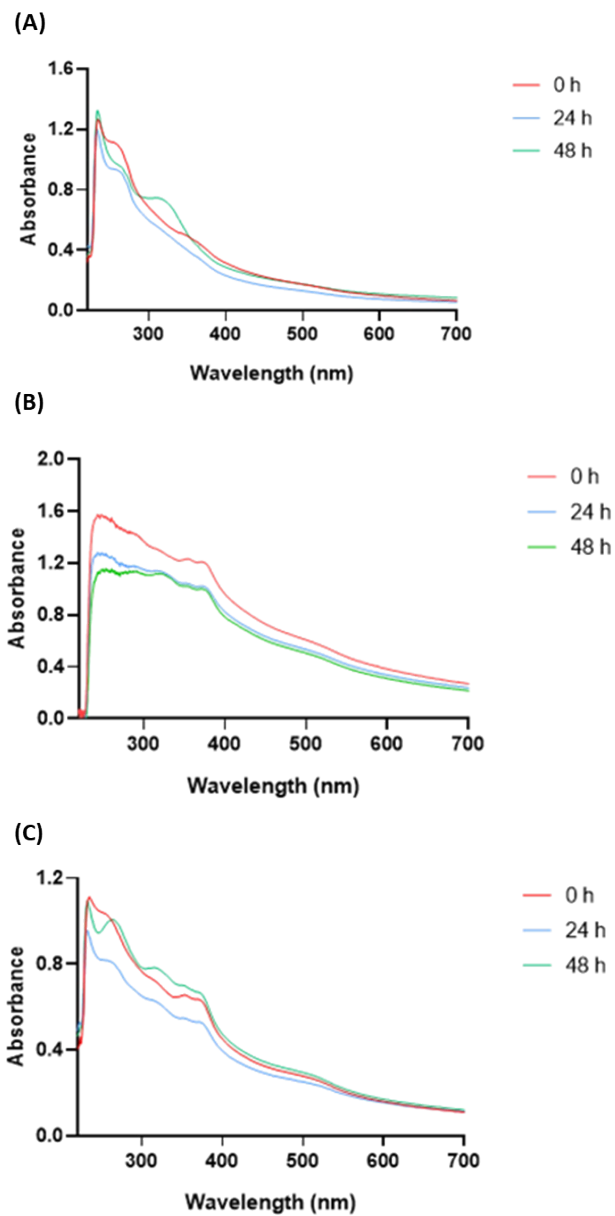

**Figure S5.** Evaluation of the stability of compounds **3a** (A), **3b** (B) and **3c** (C) by UV-Visible spectroscopy for 48 h. Absorbance spectra of 50  $\mu\text{M}$  of compounds **3c** and **3a** and 150  $\mu\text{M}$  **3b** in RPMI medium without phenol red and FBS at different incubation times: 0 h (red), 24 h (blue) and 48 h (green).

NMR spectra  
Ligands  
A L1

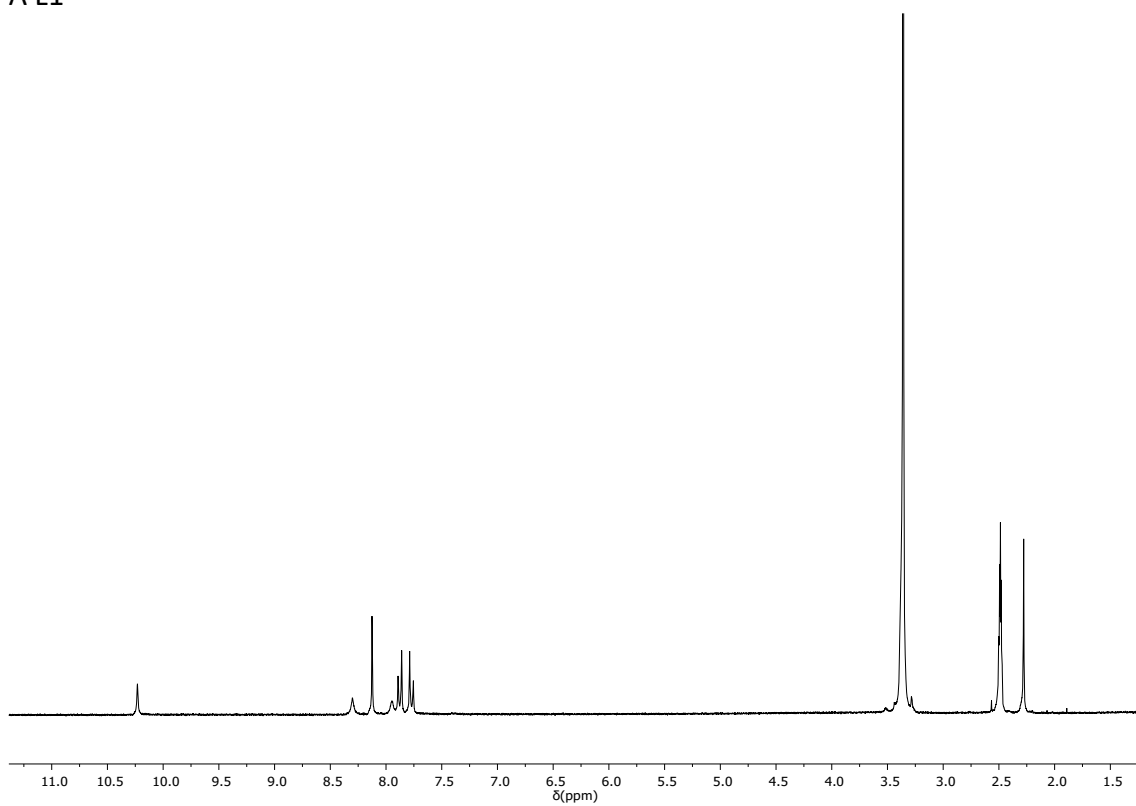

B L2

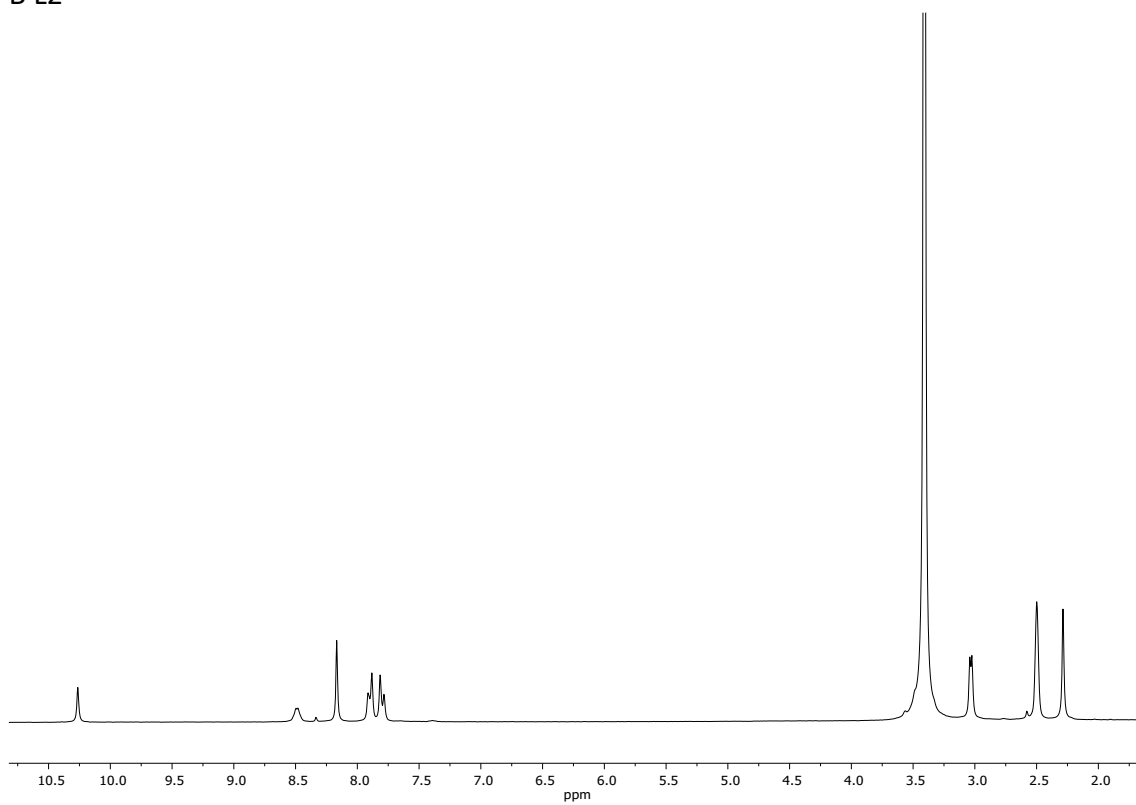

C L3

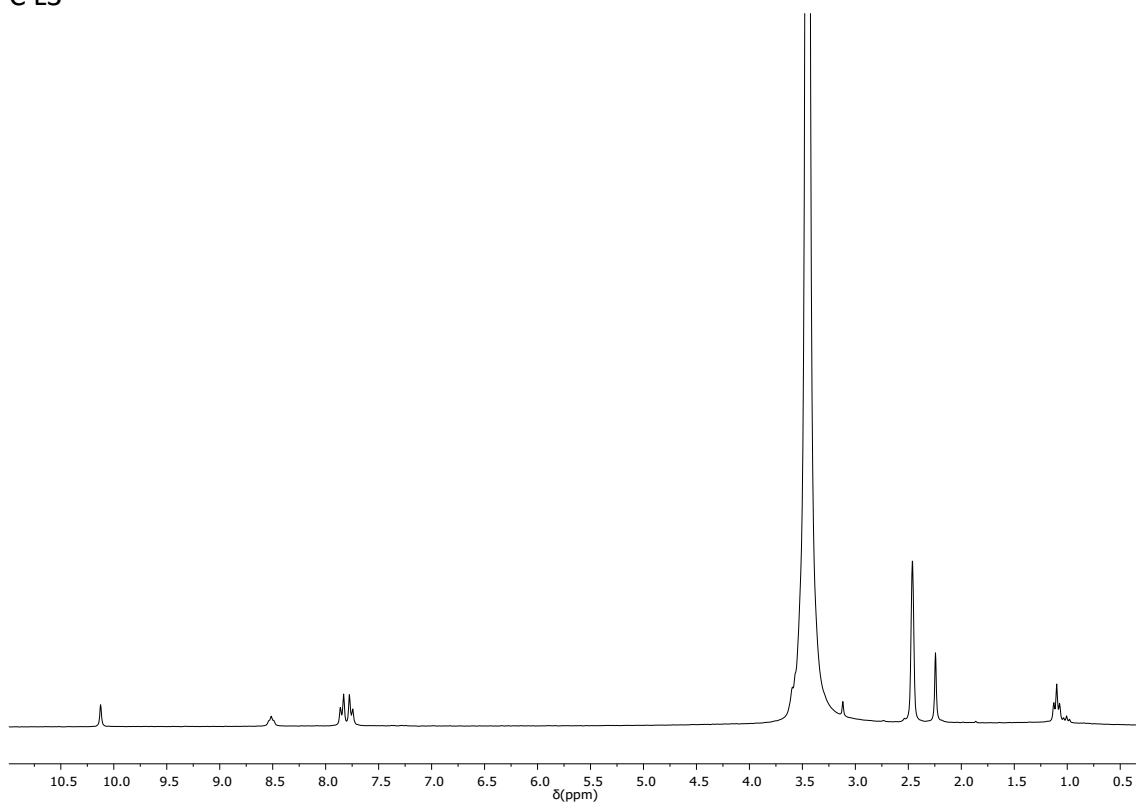

Tetranuclear platinacycles

1a [PtL1]<sub>4</sub>

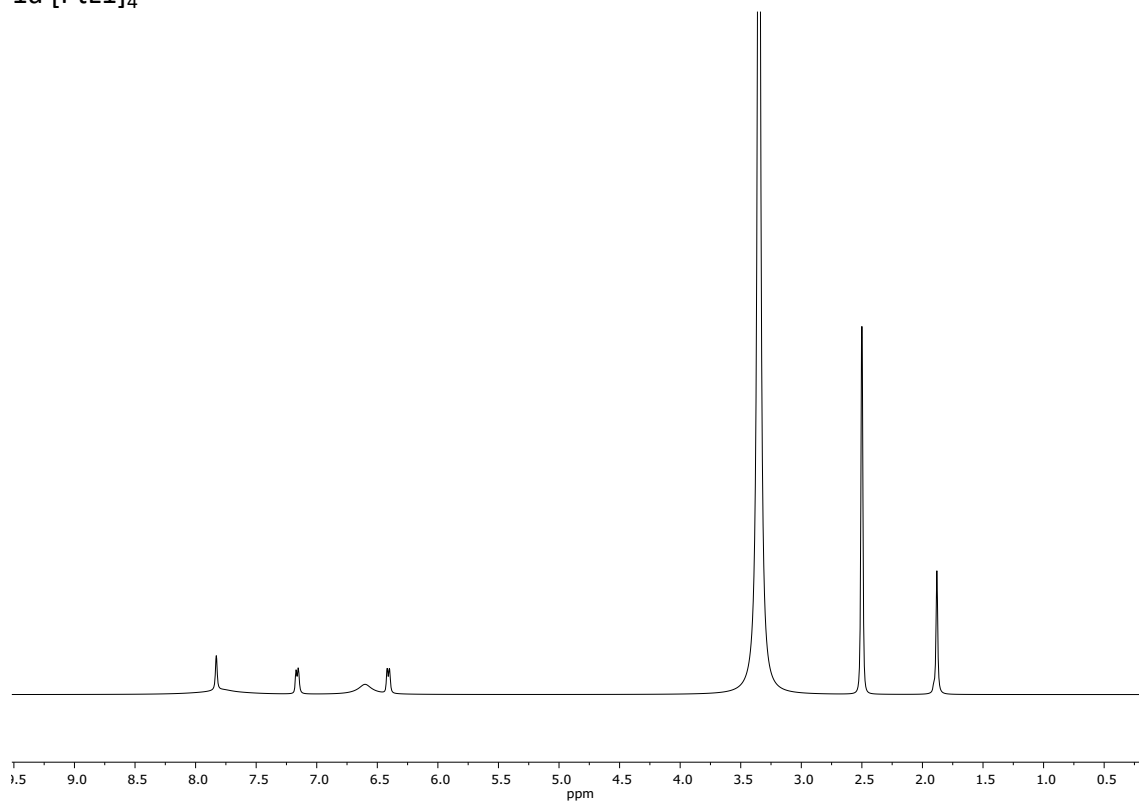

1b [PtL2]<sub>4</sub>

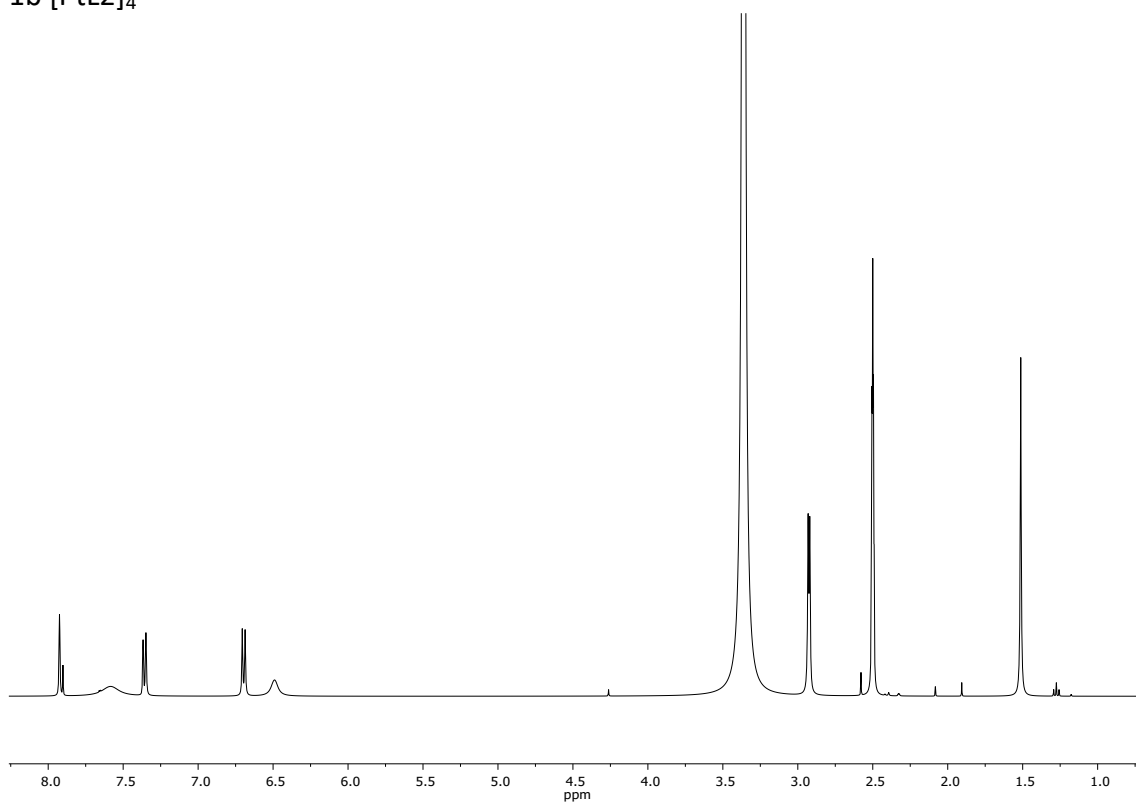

1c [PtL3]<sub>4</sub>

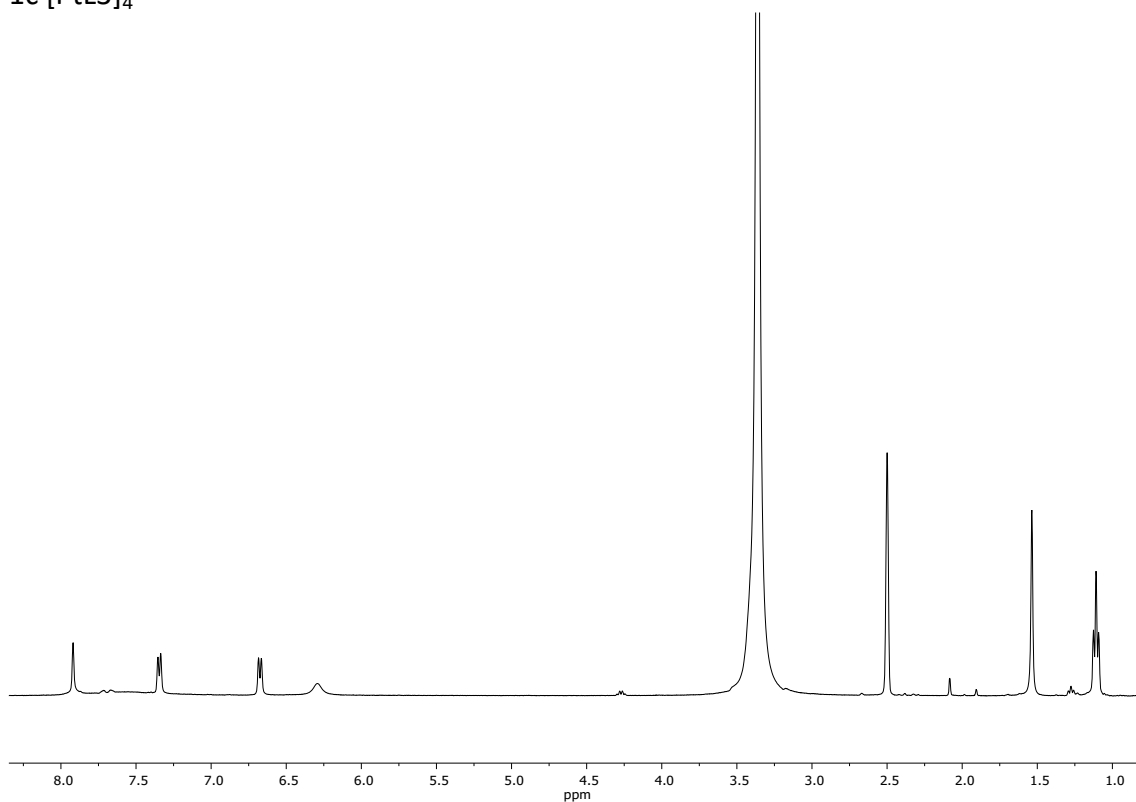



# Triphenylphosphine-bearing platinacycles

2b PtL2(PPh<sub>3</sub>)

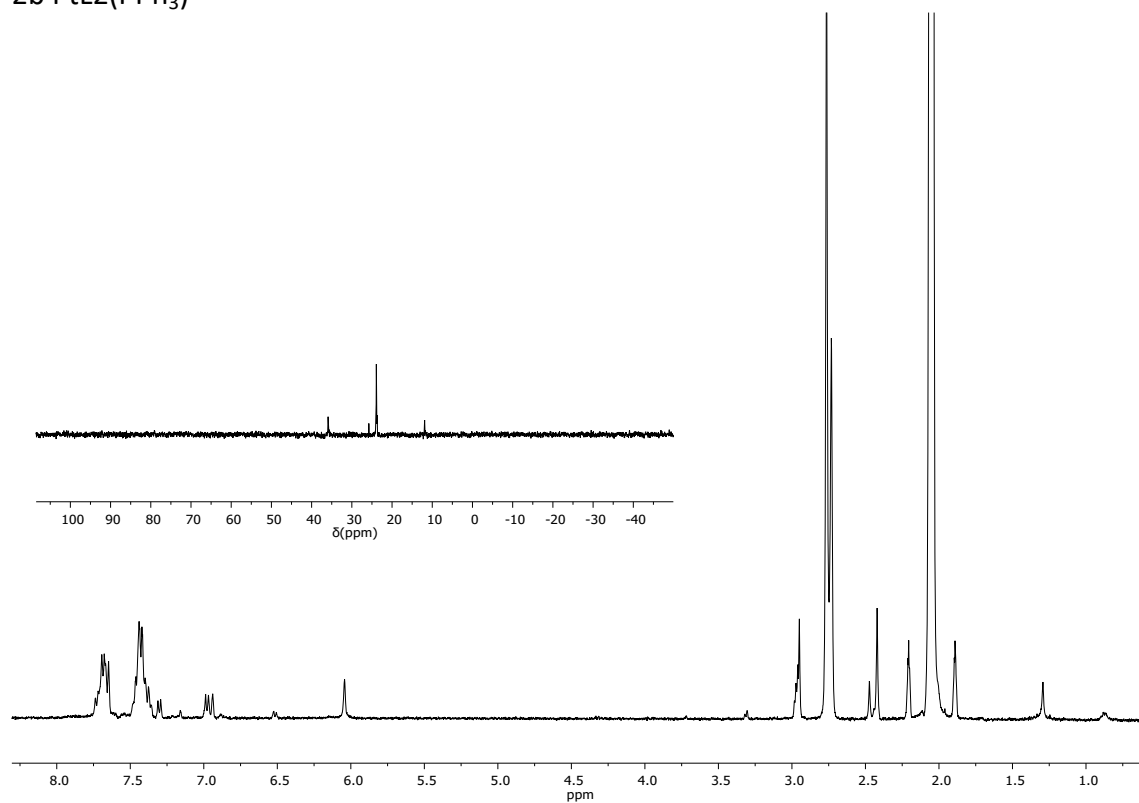

2c PtL3(PPh<sub>3</sub>)

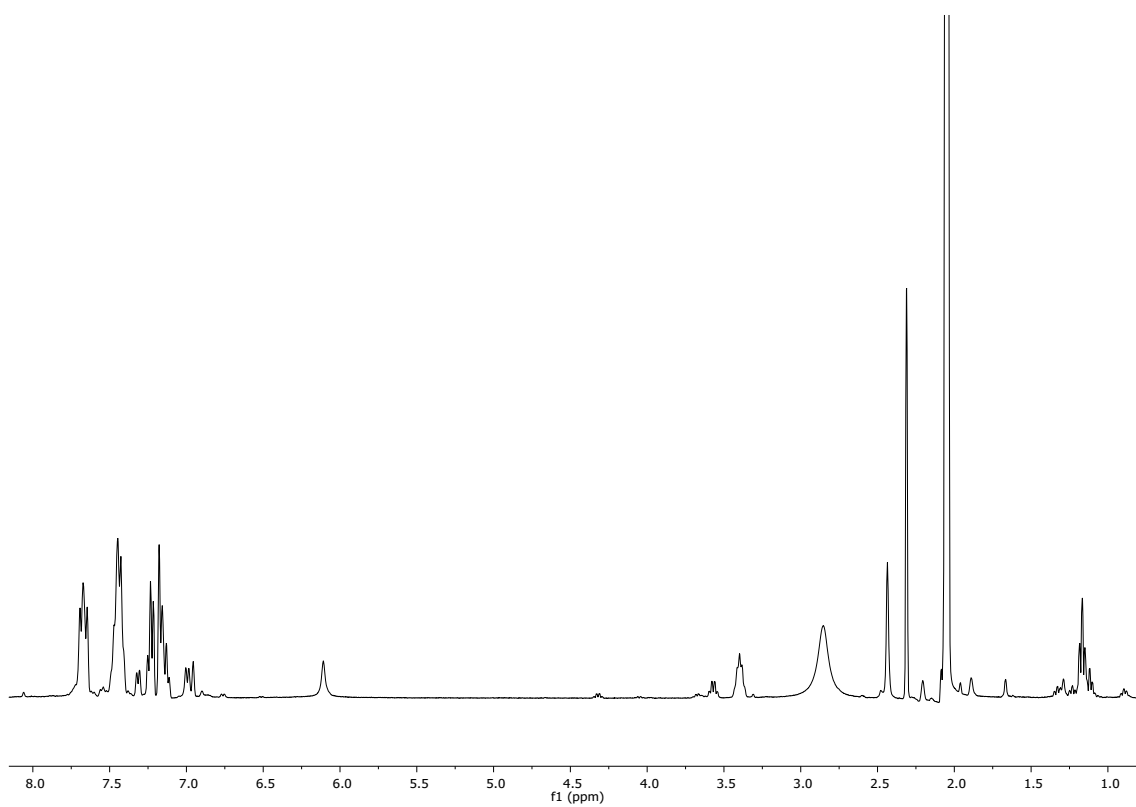

Dppm

PtL2(dppm-P)

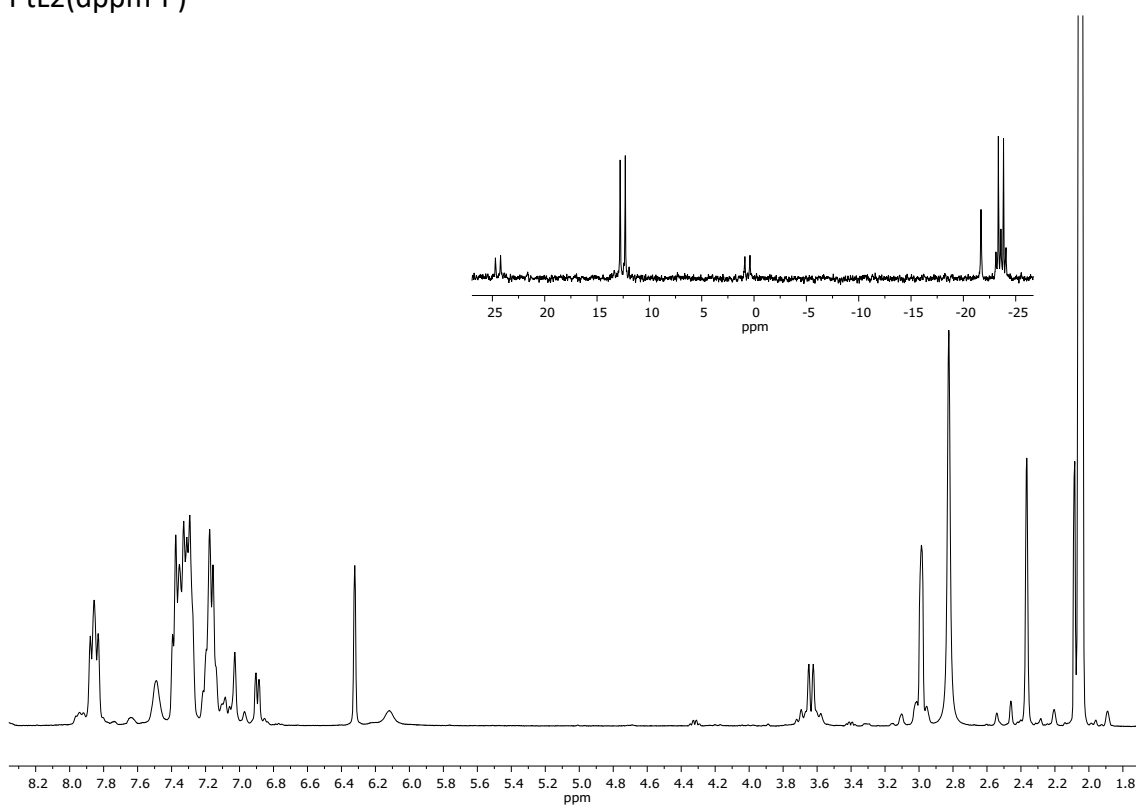

PtL3(dppm-P)

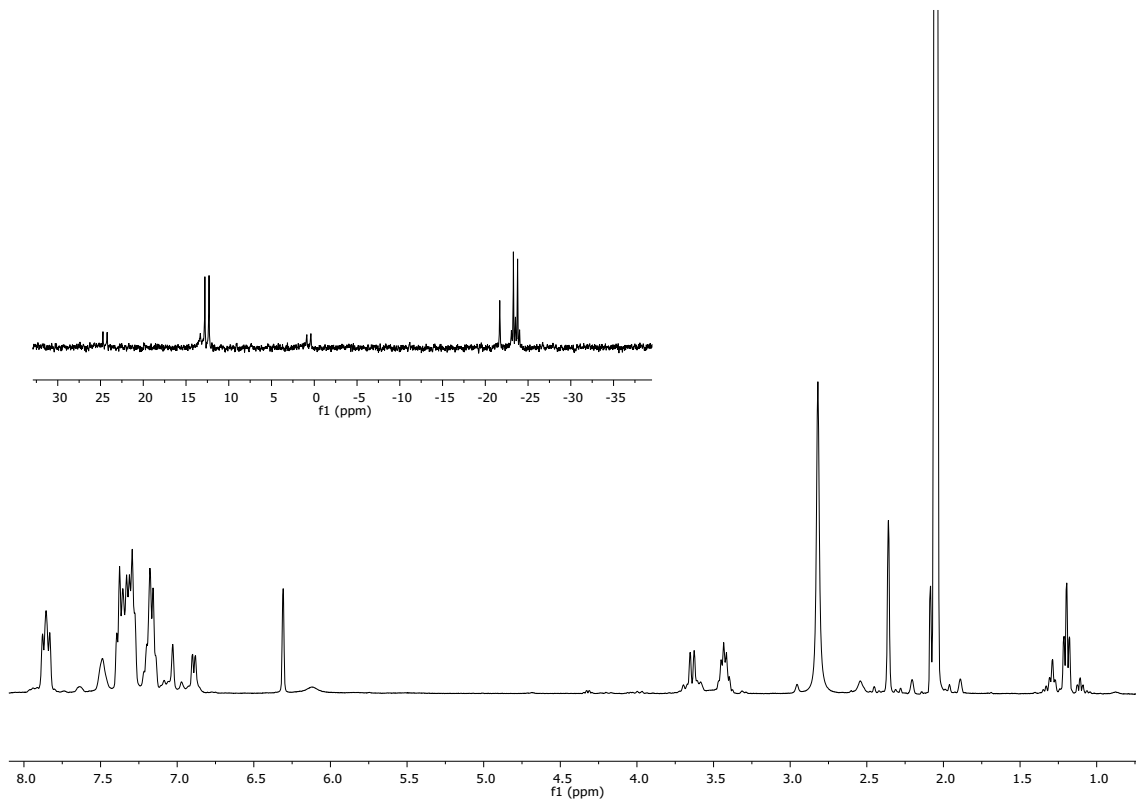

Dppb dinuclear compounds  
(PtL1)<sub>2</sub>( $\mu$ -dppb)

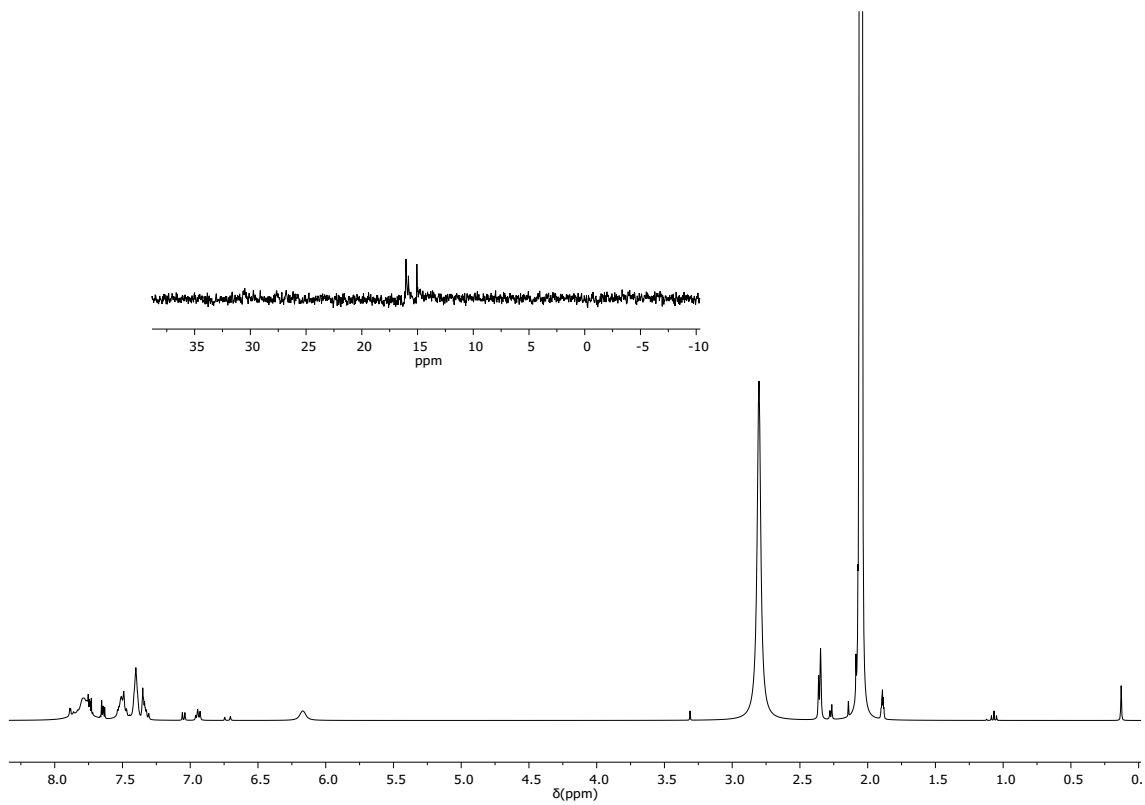

(PtL2)<sub>2</sub>(μ-dppb)

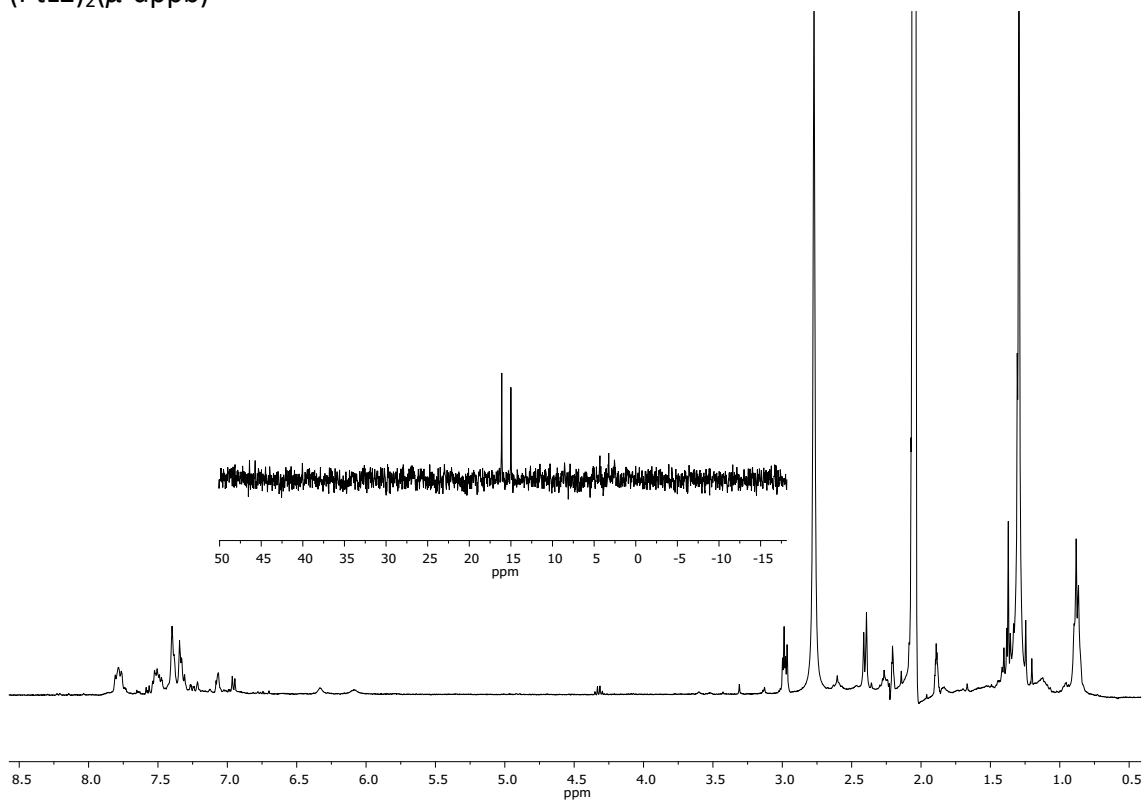

(PtL3)<sub>2</sub>(μ-dppb)

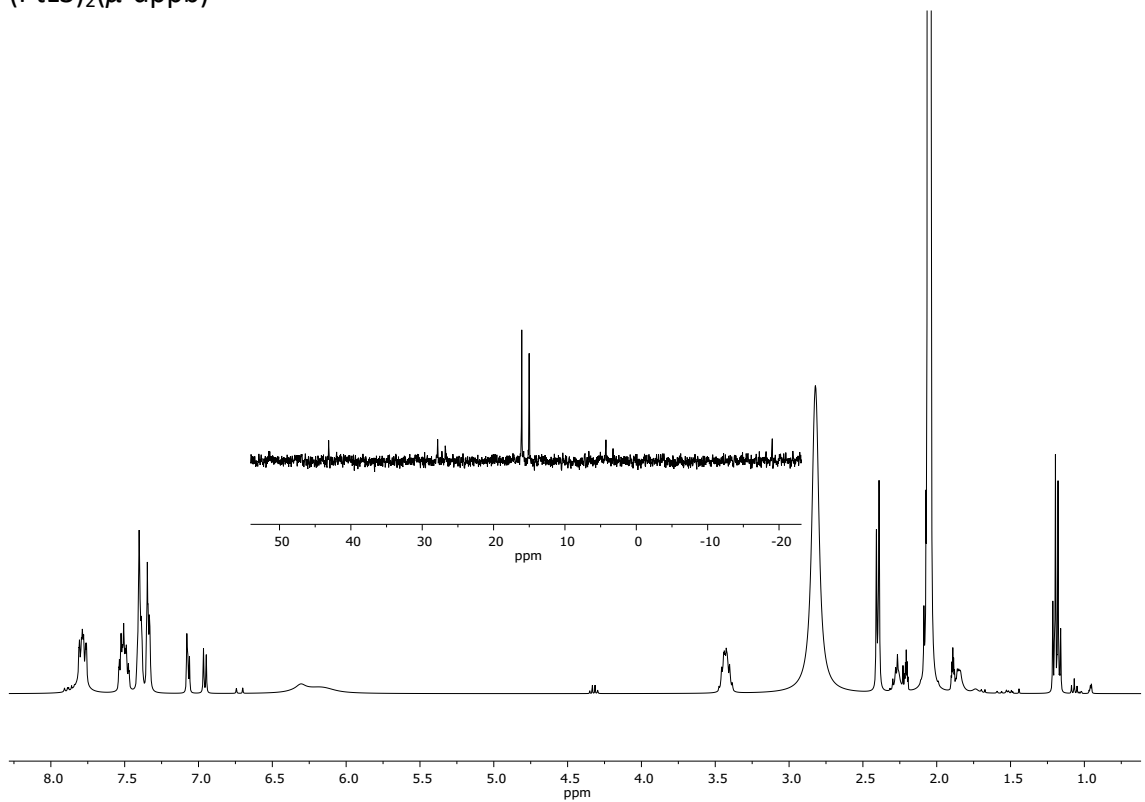

Supplement: d4dt01490a1.pdf [file d4dt01490a1.pdf]
